# Supplementary material for: Helichrysum stoechas (L.) Moench Inflorescence Extract for Tomato Disease Management
Source: MDPI journal article supplement (doi:10.3390/molecules28155861), 2023-08-03
Supplement: s1 [file s1]

# ***Helichrysum stoechas* (L.) Moench Inflorescence Extract for Tomato Diseases Management**

E. Sánchez-Hernández, J. Álvarez-Martínez, V. González-García, J. Casanova-Gascón,  
J. Martín-Gil, and P. Martín-Ramos

## SUPPLEMENTARY MATERIALS

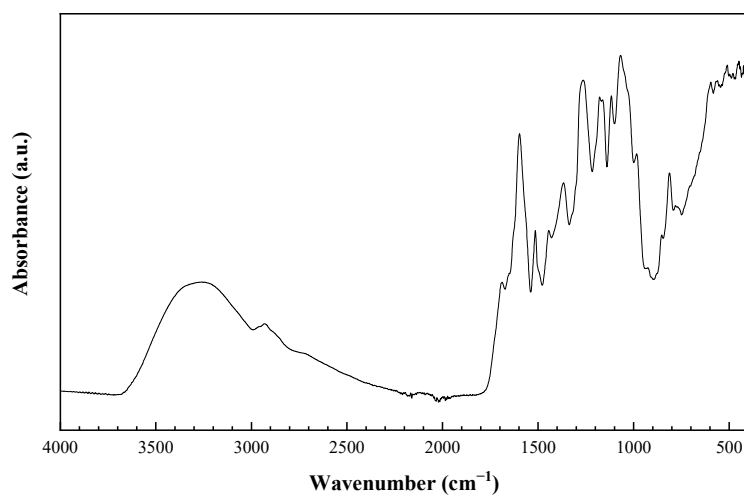

**Figure S1.** ATR-FTIR spectrum of *Helichrysum stoechas* dried inflorescences.

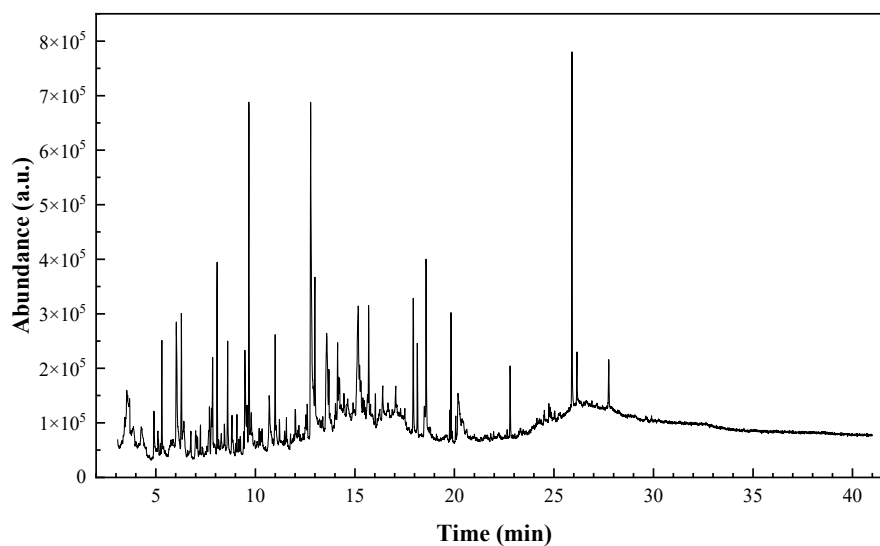

**Figure S2.** GC-MS chromatogram of *Helichrysum stoechas* hydromethanolic inflorescence extract.

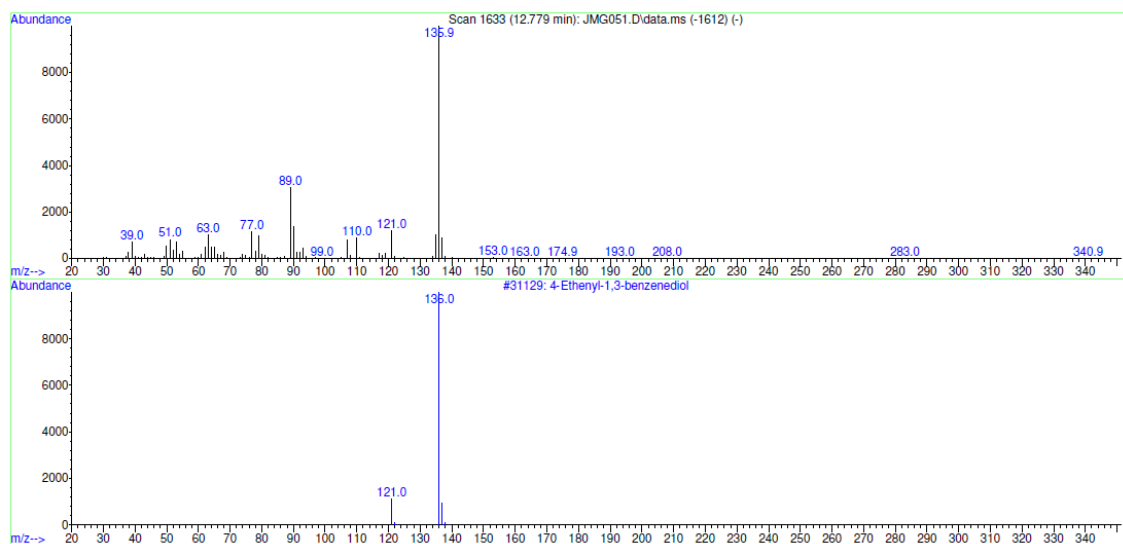

**Figure S3.** Comparison of MS spectra of 4-ethenyl-1,3-benzenediol with that of the chemical species detected at RT=12.779 min.

**Table S1.** Efficacies reported in the literature for plant extracts against the six phytopathogenic fungal taxa under study.

| Pathogen            | Source/Extraction Medium                                                                    | Plant                                       | Efficacy                                                 | Ref.      |
|---------------------|---------------------------------------------------------------------------------------------|---------------------------------------------|----------------------------------------------------------|-----------|
| <i>A. alternata</i> | Water:methanol (1:1 v/v)                                                                    | <i>Helichrysum stoechas</i> inflorescences  | MIC = 500 $\mu\text{g}\cdot\text{mL}^{-1}$               | This work |
|                     | Aqueous extracts at 1000 $\mu\text{g}\cdot\text{mL}^{-1}$                                   | <i>Acacia nilotica</i> leaves               | IR = 35.75%                                              | [1]       |
|                     |                                                                                             | <i>Datura stramonium</i> leaves             | IR = 57.50%                                              |           |
|                     |                                                                                             | <i>Allium sativum</i> cloves                | IR = 64.75%                                              |           |
|                     |                                                                                             | <i>Zingiber officinale</i> rhizome          | IR = 42.25%                                              |           |
|                     |                                                                                             | <i>Amaranthus viridis</i> leaves            | IR = 39.25%                                              |           |
|                     |                                                                                             | <i>Azadirachta indica</i> kernel and leaves | IR = 62.75%                                              |           |
|                     | Aqueous, acetone, ethanol, or methanol extracts at 200,000 $\mu\text{g}\cdot\text{mL}^{-1}$ | <i>Ocimum sanctum</i> leaves                | IR = 44.75%                                              | [2]       |
|                     |                                                                                             | <i>Lantana camara</i> leaves                | IR = n.a.–100%                                           |           |
|                     | Methanol extracts at 7000 $\mu\text{g}\cdot\text{mL}^{-1}$                                  | <i>Artemisia annua</i> leaves               | IR = 43%                                                 | [3]*      |
|                     |                                                                                             | <i>Anadenanthera colubrina</i> barks        | IR = 46%                                                 |           |
|                     |                                                                                             | <i>Ruta graveolens</i> flowers and leaves   | IR = 28%                                                 |           |
|                     | Methanol extracts at 7.5%                                                                   | <i>Curcuma longa</i> leaves                 | IR = 50%                                                 | [4]       |
|                     |                                                                                             | <i>Ocimum tenuiflorum</i> leaves            | IR = 51.90%                                              |           |
|                     |                                                                                             | <i>A. indica</i> leaves                     | IR = 45.71%                                              |           |
|                     |                                                                                             | <i>Aloe vera</i> leaves                     | IR = 34.28%                                              |           |
|                     | Aqueous extracts at 15%                                                                     | <i>Calotropis gigantea</i> leaves           | IR = 84.88%                                              | [5]       |
|                     |                                                                                             | <i>Alstonia scholaris</i> leaves            | IR = 47.66%                                              |           |
|                     |                                                                                             | <i>Z. officinale</i> rhizomes               | IR = 65.55%                                              |           |
|                     |                                                                                             | <i>D. stramonium</i> leaves                 | IR = 68.33%                                              |           |
|                     |                                                                                             | <i>A. sativum</i> cloves                    | IR = 100%                                                |           |
|                     |                                                                                             | <i>A. indica</i> leaves                     | IR = 88.22%                                              |           |
|                     |                                                                                             | <i>A. vera</i> leaves                       | IR = 52.44%                                              |           |
|                     | Aqueous extract at 4%                                                                       | <i>Cinnamomum zeylanicum</i> bark           | n.a.                                                     | [6]       |
|                     | Aqueous extracts at 10%                                                                     | <i>Oscimum sanctum</i>                      | IR = 18.47%                                              | [7]       |
|                     |                                                                                             | <i>A. indica</i>                            | IR = 35.83%                                              |           |
|                     |                                                                                             | <i>Eucalyptus globulus</i>                  | IR = 14.72%                                              |           |
|                     |                                                                                             | <i>A. sativum</i>                           | IR = 26.38%                                              |           |
|                     | Aqueous or methanol extracts at 6%                                                          | <i>C. longa</i>                             | IR = 54.92%                                              | [8]       |
|                     | Methanol extract                                                                            | <i>Annona muricata</i> pulp or seeds        | IR = 47.9–90.93%                                         |           |
|                     |                                                                                             | <i>Phoenix dactylifera</i> pits             | IC <sub>50</sub> = 2800 $\mu\text{g}\cdot\text{mL}^{-1}$ |           |
|                     | Aqueous (10%) or ethanol extracts (5%)                                                      | <i>Artemisia absinthium</i>                 | IR = 40–83.33%                                           | [10]      |

|                     |                                                                                                 |                                            |                                            |           |
|---------------------|-------------------------------------------------------------------------------------------------|--------------------------------------------|--------------------------------------------|-----------|
| Colletotrichum spp. | Aqueous extract at 20%                                                                          | <i>Rosmarinus officinalis</i>              | IR = 26.67–83.33%                          | [11]      |
|                     |                                                                                                 | <i>D. stramonium</i>                       | IR = 16.67–83.33%                          |           |
|                     |                                                                                                 | <i>Xanthium strumarium</i>                 | IR = 30–86.67%                             |           |
|                     |                                                                                                 | <i>A. indica</i> leaves                    | IR = 74.92%                                |           |
|                     |                                                                                                 | <i>Calotropis gigantia</i> leaves          | IR = 58.14%                                |           |
|                     |                                                                                                 | <i>C. longa</i> leaves                     | IR = 66.55%                                |           |
|                     |                                                                                                 | <i>A. sativum</i> cloves                   | IR = 77.25%                                |           |
|                     |                                                                                                 | <i>Z. officinale</i> rhizomes              | IR = 77%                                   |           |
|                     |                                                                                                 | <i>Ocimum sanctum</i> leaves               | IR = 61.97%                                |           |
|                     |                                                                                                 | <i>Allium cepa</i> bulbs                   | IR = 74.19%                                |           |
|                     |                                                                                                 | <i>Parthenium hysterophorus</i> leaves     | IR = 43.71%                                |           |
|                     | Aqueous extracts at 10%                                                                         | <i>Eucalyptus obliqua</i> leaves           | IR = 72.82%                                | [12]      |
|                     |                                                                                                 | <i>A. indica</i>                           | IR = 68.30%                                |           |
|                     |                                                                                                 | <i>Sapindus mukorossi</i>                  | IR = 73.04%                                |           |
|                     |                                                                                                 | <i>A. sativum</i>                          | IR = 42.11%                                |           |
|                     |                                                                                                 | <i>Calotropis procera</i>                  | IR = 20.96%                                |           |
|                     |                                                                                                 | <i>Psidium guajava</i>                     | IR = 40.93%                                |           |
|                     |                                                                                                 | <i>Vitex negundo</i>                       | IR = 35.71%                                |           |
|                     |                                                                                                 | <i>Glyricidia maculata</i>                 | IR = 44.33%                                |           |
|                     |                                                                                                 | <i>Solanum torvum</i>                      | IR = 31.82%                                |           |
|                     |                                                                                                 | <i>L. camara</i>                           | IR = 45.33%                                |           |
| Colletotrichum spp. | Water:methanol (1:1 v/v) against <i>Colletotrichum coccodes</i>                                 | <i>H. stoechas</i> inflorescences          | MIC = 375 $\mu\text{g}\cdot\text{mL}^{-1}$ | This work |
|                     | Ethanol extracts at 750 $\mu\text{g}\cdot\text{mL}^{-1}$ against <i>Colletotrichum acutatum</i> | <i>A. sativum</i> peels                    | IR $\geq$ 50%                              |           |
|                     | Aqueous extracts at 10% against <i>Colletotrichum gloeosporioides</i>                           | <i>A. cepa</i> peels                       | IR $\geq$ 50%                              | [13]*     |
|                     |                                                                                                 | <i>Ageratum conyzoides</i> leaves          | IR = 56.83%                                |           |
|                     |                                                                                                 | <i>A. sativum</i> leaves                   | IR = 100%                                  | [14]*     |
|                     |                                                                                                 | <i>Jatropha curcas</i> leaves              | IR = 49.90%                                |           |
|                     |                                                                                                 | <i>Ocimum basilicum</i> leaves             | IR = 100%                                  |           |
|                     |                                                                                                 | <i>Vernonia amygdalina</i> leaves          | IR = 48.32%                                |           |
|                     | Aqueous extracts at 20% against <i>C. gloeosporioides</i>                                       | <i>Achras sapota</i> leaves or stems       | IR = 37.5–42.5%                            | [15]      |
|                     |                                                                                                 | <i>Annona reticulata</i> leaves or stems   | IR = 22.5–27.5%                            |           |
|                     |                                                                                                 | <i>Carica papaya</i> leaves or stems       | IR = 27.5–35%                              |           |
|                     |                                                                                                 | <i>Citrus lemon</i> leaves or stems        | IR = 32.4–100%                             |           |
|                     |                                                                                                 | <i>Dyospiros ebenaster</i> leaves or stems | IR = 35–37.5%                              |           |
|                     |                                                                                                 | <i>Mangifera indica</i> leaves or stems    | IR = 25–37.5%                              |           |

|                                                                                                 |                                                |                                                  |      |
|-------------------------------------------------------------------------------------------------|------------------------------------------------|--------------------------------------------------|------|
|                                                                                                 | <i>Persea americana</i> leaves or stems        | IR = 30–100%                                     |      |
|                                                                                                 | <i>Pouteria sapota</i> leaves or stems         | IR = 12.5–52.5%                                  |      |
|                                                                                                 | <i>Spondias purpurea</i> leaves or stems       | IR = 37.5–50%                                    |      |
|                                                                                                 | <i>Tamarindus indicus</i> leaves or stems      | IR = 42.5–65%                                    |      |
| Aqueous extracts at 90% against <i>Colletotrichum</i> sp.                                       | <i>Piper nigrum</i> seeds                      | IR = 82.19%                                      | [16] |
|                                                                                                 | <i>Z. officinale</i> rhizomes                  | IR = 76.98%                                      |      |
|                                                                                                 | <i>A. indica</i> leaves                        | IR = 57.30%                                      |      |
|                                                                                                 | <i>C. papaya</i> leaves                        | IR = 51.97%                                      |      |
|                                                                                                 | <i>Nicotiana tabacum</i> leaves                | IR = 61.82%                                      |      |
| Methanol extracts at 2000 $\mu\text{g}\cdot\text{mL}^{-1}$ against <i>C. gloeosporioides</i>    | <i>Acacia pennatula</i> roots                  | IR = 54.4%                                       | [17] |
|                                                                                                 | <i>Petiveria alliacea</i> leaves               | IR = 6.2%                                        |      |
|                                                                                                 | <i>Piscidia piscipula</i> leaves               | IR = 56.2%                                       |      |
|                                                                                                 | <i>Pithecellobium albicans</i> leaves or roots | IR = 4.4–23.1%                                   |      |
|                                                                                                 | <i>Pithecellobium dulce</i> leaves or roots    | IR = 21.2–81.2%                                  |      |
|                                                                                                 | <i>Tribulus cistoides</i> leaves or roots      | IR = 23.1%                                       |      |
| Aqueous extracts at 20% against <i>Colletotrichum dematium</i>                                  | <i>Viguiera dentata</i> leaves                 | IR = 43.7%                                       | [18] |
|                                                                                                 | <i>A. sativum</i> leaves                       | IR = 72.73%                                      |      |
|                                                                                                 | <i>Z. officinale</i> leaves                    | IR = 39.83%                                      |      |
|                                                                                                 | <i>A. cepa</i> leaves                          | IR = 53.47%                                      |      |
|                                                                                                 | <i>A. indica</i> leaves                        | IR = 32.47%                                      |      |
| Acetone, aqueous or methanol extracts at 20% against <i>C. gloeosporioides</i>                  | <i>Prosopis hystrophorus</i> leaves            | IR = 79.6–100%                                   | [19] |
|                                                                                                 | <i>L. camara</i> leaves                        | IR = 65.2–86.3%                                  |      |
|                                                                                                 | <i>Mimosa diplotricha</i> leaves               | IR = 26.6–56.7%                                  |      |
|                                                                                                 | <i>P. hystrophorus</i> leaves                  | IR = 28.1–64.8%                                  |      |
|                                                                                                 | <i>Echhornia crassipes</i> leaves              | IR = 45.2–71.1%                                  |      |
| Methanol extracts at 400,000 $\mu\text{g}\cdot\text{mL}^{-1}$ against <i>C. gloeosporioides</i> | <i>Bromelia pinguin</i> pulp or peels          | IR < 5%                                          | [20] |
|                                                                                                 | <i>Psidium sartorianum</i> pulp or seeds       | IR = 20.4–25.7%                                  |      |
|                                                                                                 | <i>S. purpurea</i> Pulp or peels               | IR < 5%                                          |      |
|                                                                                                 | <i>Echeveria craigiana</i> leaves              | IR < 5%                                          |      |
|                                                                                                 | <i>Echeveria kimnachii</i> leaves              | IR = 23.1%                                       |      |
|                                                                                                 | <i>Echeveria subrigida</i> leaves              | IR < 5%                                          |      |
|                                                                                                 | <i>P. dulce</i> pulp, peles or seeds           | IR < 5–21.5%                                     |      |
|                                                                                                 | <i>Randia echinocarpa</i> pulp or seeds        | IR = 4.73–60.8%                                  |      |
|                                                                                                 | <i>Vitex mollis</i> pulp or seeds              | IR = 21.4–100%                                   |      |
|                                                                                                 | <i>A. sativum</i> bulbs                        | MIC = n.a.–6250 $\mu\text{g}\cdot\text{mL}^{-1}$ | [21] |

|                                                                                                                      |                                                   |                                                    |      |
|----------------------------------------------------------------------------------------------------------------------|---------------------------------------------------|----------------------------------------------------|------|
| Acetone, aqueous or ethyl acetate extracts against <i>Colletotrichum lindemuthianum</i> and <i>C. dematium</i>       | <i>Agapanthus caulescens</i> whole plant          | MIC = n.a.–6250 $\mu\text{g}\cdot\text{mL}^{-1}$   |      |
|                                                                                                                      | <i>Syzygium cordatum</i> fruits                   | MIC = 780–6250 $\mu\text{g}\cdot\text{mL}^{-1}$    |      |
|                                                                                                                      | <i>C. papaya</i> leaves                           | MIC = n.a.–1560 $\mu\text{g}\cdot\text{mL}^{-1}$   |      |
|                                                                                                                      | <i>Chlrophytym comosum</i> whole plant            | MIC = n.a.–12,500 $\mu\text{g}\cdot\text{mL}^{-1}$ |      |
|                                                                                                                      | <i>Ipomoea batatas</i> leaves                     | n.a.                                               |      |
| Acetone or ethanol extracts at 5000 $\mu\text{g}\cdot\text{mL}^{-1}$ against <i>C. gloeosporioides</i>               | <i>Lantana hirta</i> leaves or flowers            | IR = n.a.–100%                                     | [22] |
|                                                                                                                      | <i>Argemone ochroleuca</i> leaves-fruits or roots | IR = n.a.–100%                                     |      |
|                                                                                                                      | <i>Adenophyllum porophyllum</i> leaves            | IR = 10–100%                                       |      |
| Aqueous extract at 70% against <i>C. gloeosporioides</i>                                                             | <i>Swietenia macrophylla</i> seeds                | IR = 26.24%                                        | [23] |
|                                                                                                                      | <i>Z. officinale</i> rhizomes                     | IR = 34.87%                                        |      |
|                                                                                                                      | <i>N. tabacum</i> leaves                          | IR = 18.54%                                        |      |
|                                                                                                                      | <i>C. gigantea</i> leaves                         | IR = 24.38%                                        |      |
|                                                                                                                      | <i>A. sativum</i> cloves                          | IR = 60.45%                                        |      |
|                                                                                                                      | <i>Sonneratia apetala</i> pulp or seeds           | IR = 29.64–40.39%                                  |      |
| Ethanol extract against <i>Colletotrichum</i> spp.                                                                   | <i>Pimenta dioica</i> leaves                      | MIC = 5000–10,000 $\mu\text{g}\cdot\text{mL}^{-1}$ | [24] |
|                                                                                                                      | <i>Piper auritum</i> leaves                       | MIC = 40,000 $\mu\text{g}\cdot\text{mL}^{-1}$      |      |
|                                                                                                                      | <i>Plectranthus amboinicus</i> leaves             | MIC = 5000–10,000 $\mu\text{g}\cdot\text{mL}^{-1}$ |      |
|                                                                                                                      | <i>P. guajava</i> leaves                          | MIC > 40,000 $\mu\text{g}\cdot\text{mL}^{-1}$      |      |
| Ethanol extracts at 10,000 $\mu\text{g}\cdot\text{mL}^{-1}$ against <i>C. gloeosporioides</i>                        | <i>Hydnocarpus anthelmintica</i> fruits           | IR = 51.11%                                        | [25] |
|                                                                                                                      | <i>Crateva magna</i> fruits                       | IR = 52.22%                                        |      |
|                                                                                                                      | <i>Caesalpinia sappan</i> barks                   | IR = 34.78%                                        |      |
|                                                                                                                      | <i>Xanthophyllum lanceatum</i> fruits             | IR = 20%                                           |      |
|                                                                                                                      | <i>Carallia brachiata</i> barks                   | IR = 18.11%                                        |      |
| Chloroform, hexane, or methanol extracts at 400 $\mu\text{g}\cdot\text{mL}^{-1}$ against <i>Colletotrichum musae</i> | <i>Terminalia arjuna</i> leaves                   | IR = 35.19–49.63%                                  | [26] |
|                                                                                                                      | <i>Clerodendrum infortunatum</i> leaves           | IR = 9.63–78.15%                                   |      |
|                                                                                                                      | <i>Anethum graveolens</i> seeds                   | IR = 30.74–49.67%                                  |      |
|                                                                                                                      | <i>Z. officinale</i> rhizomes                     | IR = 9.26–87.41%                                   |      |
|                                                                                                                      | <i>A. sativum</i> bulbs                           | IR = 19.63–34.48%                                  |      |
|                                                                                                                      | <i>L. camara</i> leaves                           | IR = 38.15–51.48%                                  |      |
|                                                                                                                      | <i>N. tabacum</i> leaves                          | IR = 15.19–41.48%                                  |      |
|                                                                                                                      | <i>Polygonum hydropiper</i> leaves                | IR = 15.19–38.30%                                  |      |
|                                                                                                                      | <i>Pongamia pinnata</i> seeds                     | IR = 11.48–37.89%                                  |      |
|                                                                                                                      | <i>Polyalthia longifolia</i> leaves               | IR = 10.37–84.07%                                  |      |
| Aqueous crude extract against <i>C. acutatum</i>                                                                     | <i>Tectona grandis</i> leaves                     | IR = 27.78–60.59%                                  | [27] |
|                                                                                                                      | <i>Rhus coriaria</i> fruits                       | MIC = 5 $\mu\text{g}\cdot\text{mL}^{-1}$           |      |

|                     |                                                        |                                                    |                                                 |           |
|---------------------|--------------------------------------------------------|----------------------------------------------------|-------------------------------------------------|-----------|
| <i>F. oxysporum</i> | Water:methanol (1:1 v/v)                               | <i>H. stoechas</i> inflorescences                  | MIC = 500 $\mu\text{g}\cdot\text{mL}^{-1}$      | This work |
|                     | Methanol/water extract (1:1 v/v)                       | <i>Armeria maritima</i> flowers                    | MIC = 750 $\mu\text{g}\cdot\text{mL}^{-1}$      | [28]      |
|                     | Aqueous extracts at 4%                                 | <i>C. zeylanicum</i> barks                         | IR $\leq$ 30%                                   | [6]       |
|                     |                                                        | <i>A. indica</i> leaves                            | n.a.                                            |           |
|                     | Aqueous extracts at 5, 10, and 20%                     | <i>P. hysterophorus</i> leaves and flowers         | IR = 2.6–15.9%                                  | [29]      |
|                     |                                                        | <i>Momordica charantia</i> leaves                  | IR = 14.4–24.4%                                 |           |
|                     |                                                        | <i>A. sativum</i> cloves                           | IR = 52.6–63.3%                                 |           |
|                     |                                                        | <i>E. globulus</i> leaves                          | IR = 34.3–61.8%                                 |           |
|                     |                                                        | <i>C. procera</i> leaves                           | n.a.                                            |           |
|                     |                                                        | <i>A. vera</i> leaves                              | IR = 16.6%                                      |           |
|                     |                                                        | <i>Beta vulgaris</i> roots                         | IR = 6.3–10.3%                                  |           |
|                     | Aqueous or propanol extracts at 1%                     | <i>D. stramonium</i> leaves                        | IR = 61.1%                                      | [30]      |
|                     | Chloroform, ethyl acetate, methanol or hexane extracts | <i>Punica granatum</i> fruits                      | IR = 62–78%                                     |           |
|                     | Crude extracts at 5, 10, and 20%                       | <i>Cestrum nocturnum</i> flowers                   | MIC = 500–1000 $\mu\text{g}\cdot\text{mL}^{-1}$ | [31]      |
|                     |                                                        | <i>A. indica</i> leaves                            | IR = 24.1–62.0%                                 | [32]      |
|                     |                                                        | <i>O. sanctum</i> leaves                           | IR = 7.0–17.0%                                  |           |
|                     |                                                        | <i>Datura metel</i> leaves                         | IR = 10.1–34.2%                                 |           |
|                     |                                                        | <i>Cassia alata</i> leaves                         | IR = 46.8–74.7%                                 |           |
|                     |                                                        | <i>Asparagus racemosus</i> roots                   | IR = 44.3–57.0%                                 |           |
|                     |                                                        | <i>A. sativum</i> bulbs                            | IR = 17.6–34.2%                                 |           |
|                     | Ethanol extracts                                       | <i>Z. officinale</i> tubers                        | IR = 23.7–39.5%                                 | [33]      |
|                     |                                                        | <i>Flourensia microphylla</i> leaves               | MIC = 1500 $\mu\text{L}\cdot\text{L}^{-1}$      |           |
|                     |                                                        | <i>Flourensia cernua</i> leaves                    | MIC = 1500 $\mu\text{L}\cdot\text{L}^{-1}$      |           |
|                     | Aqueous extracts at 5–50%                              | <i>Flourensia retinophylla</i> leaves              | MIC = 1500 $\mu\text{L}\cdot\text{L}^{-1}$      | [34]      |
|                     |                                                        | <i>Moringa oleifera</i> leaves, roots or pud coats | IR = 36–100%                                    |           |
|                     | Aqueous extracts at 25%                                | <i>A. nilotica</i> leaves                          | IR = 82%                                        | [35]      |
|                     |                                                        | <i>A. zapota</i> leaves                            | IR = 34.8%                                      |           |
|                     |                                                        | <i>D. stramonium</i> leaves                        | IR = 67.5%                                      |           |
|                     |                                                        | <i>E. officinalis</i> leaves                       | IR = 79.5%                                      |           |
|                     |                                                        | <i>E. globulus</i> leaves                          | IR = 59.3%                                      |           |
|                     |                                                        | <i>L. inermis</i> leaves                           | IR = 82.0%                                      |           |
|                     |                                                        | <i>M. elengi</i> leaves                            | IR = 86.0%                                      |           |
|                     |                                                        | <i>P. pterocarpum</i> leaves                       | IR = 53.3%                                      |           |
|                     |                                                        | <i>P. longifolia</i> leaves                        | IR = 36.3%                                      |           |
|                     |                                                        | <i>P. juliflora</i> leaves                         | IR = 80.3%                                      |           |

|                   |                                |                                               |                                                          |           |
|-------------------|--------------------------------|-----------------------------------------------|----------------------------------------------------------|-----------|
| <i>V. dahliae</i> | Aqueous extracts at 0.2% (w/v) | <i>P. granatum</i> leaves                     | IR = 73.8%                                               | [36]      |
|                   |                                | <i>Syzygium. cumini</i> leaves                | IR = 69.5%                                               |           |
|                   |                                | <i>Filipendula</i> spp. flowers               | IR = 95.9%                                               |           |
|                   |                                | <i>A. sativum</i>                             | IR = 81.4%                                               |           |
|                   | Ethanollic extract             | <i>Mentha spicata</i> leaves and stems        | MIC = 5%                                                 | [37]      |
|                   | Aqueous extract                | <i>A. sativum</i> leaves                      | MIC = 7000 $\mu\text{g}\cdot\text{mL}^{-1}$              | [38]      |
|                   | Water:methanol (1:1 v/v)       | <i>H. stoechas</i> inflorescences             | MIC = 375 $\mu\text{g}\cdot\text{mL}^{-1}$               | This work |
|                   | Methanol extract               | <i>P. dactylifera</i> pits                    | IC <sub>50</sub> = 6700 $\mu\text{g}\cdot\text{mL}^{-1}$ |           |
|                   | Aqueous ammonia extracts       | <i>Sambucus nigra</i> flower extract          | MIC = 1500 $\mu\text{g}\cdot\text{mL}^{-1}$              | [39]      |
|                   |                                | <i>S. nigra</i> leaf extract                  | MIC = 1500 $\mu\text{g}\cdot\text{mL}^{-1}$              |           |
|                   | Aqueous ammonia extract        | <i>Uncaria tomentosa</i> bark extract         | MIC = 500 $\mu\text{g}\cdot\text{mL}^{-1}$               | [40]      |
|                   | Aqueous extracts               | <i>Origanum heracleoticum</i> inflorescences  | MIC > 500,000 $\mu\text{g}\cdot\text{mL}^{-1}$           | [41]      |
|                   |                                | <i>Salvia officinalis</i> leaves              | MIC > 500,000 $\mu\text{g}\cdot\text{mL}^{-1}$           |           |
|                   |                                | <i>R. officinalis</i> leaves and flowers      | MIC > 500,000 $\mu\text{g}\cdot\text{mL}^{-1}$           |           |
|                   | Aqueous extracts               | <i>Mentha piperita</i>                        | MIC > 100,000 $\mu\text{g}\cdot\text{mL}^{-1}$           | [42]      |
|                   |                                | <i>Thymus vulgaris</i>                        | MIC > 100,000 $\mu\text{g}\cdot\text{mL}^{-1}$           |           |
|                   |                                | <i>Lavandula angustifolia</i>                 | MIC > 100,000 $\mu\text{g}\cdot\text{mL}^{-1}$           |           |
|                   | Ethyl acetate extract          | <i>Artemisia argyi</i>                        | EC <sub>50</sub> = 1227 $\mu\text{g}\cdot\text{mL}^{-1}$ | [43]      |
|                   | Methanol extract               | <i>Haplophyllum tuberculatum</i> aerial parts | MIC > 1000 $\mu\text{g}\cdot\text{mL}^{-1}$              | [44]      |
|                   | Chloroform extract             | <i>Chrysanthemum coronarium</i> aerial parts  | MIC = 1000 $\mu\text{g}\cdot\text{mL}^{-1}$              |           |
|                   | Acetone extracts               | <i>A. sativum</i> leaves and stems            | MIC > 5000 $\mu\text{g}\cdot\text{mL}^{-1}$              | [45]      |
|                   |                                | <i>Allium</i> sp. leaves and stems            | MIC > 5000 $\mu\text{g}\cdot\text{mL}^{-1}$              |           |
|                   |                                | <i>Atropa belladonna</i> leaves and stems     | MIC > 5000 $\mu\text{g}\cdot\text{mL}^{-1}$              |           |
|                   |                                | <i>A. indica</i> leaves and stems             | MIC > 5000 $\mu\text{g}\cdot\text{mL}^{-1}$              |           |
|                   |                                | <i>Castanea sativa</i> leaves and stems       | MIC > 5000 $\mu\text{g}\cdot\text{mL}^{-1}$              |           |
|                   |                                | <i>Citrus aurantium</i> leaves and stems      | MIC > 5000 $\mu\text{g}\cdot\text{mL}^{-1}$              |           |
|                   |                                | <i>Citrus</i> sp. leaves and stems            | MIC = 5000 $\mu\text{g}\cdot\text{mL}^{-1}$              |           |
|                   |                                | <i>Inula viscosa</i> leaves and stems         | MIC > 5000 $\mu\text{g}\cdot\text{mL}^{-1}$              |           |
|                   |                                | <i>Juniperus communis</i> leaves and stems    | MIC > 5000 $\mu\text{g}\cdot\text{mL}^{-1}$              |           |
|                   |                                | <i>Olea europaea</i> leaves and stems         | MIC > 5000 $\mu\text{g}\cdot\text{mL}^{-1}$              |           |
|                   |                                | <i>Papaver rhoeas</i> leaves and stems        | MIC > 5000 $\mu\text{g}\cdot\text{mL}^{-1}$              |           |
|                   |                                | <i>Pistacia lentiscus</i> leaves and stems    | MIC > 5000 $\mu\text{g}\cdot\text{mL}^{-1}$              |           |
|                   |                                | <i>S. officinalis</i> leaves and stems        | MIC > 5000 $\mu\text{g}\cdot\text{mL}^{-1}$              |           |
|                   |                                | <i>S. nigra</i> leaves and stems              | MIC > 5000 $\mu\text{g}\cdot\text{mL}^{-1}$              |           |



|                  |                                                                                       |                                            |                                                                 |           |
|------------------|---------------------------------------------------------------------------------------|--------------------------------------------|-----------------------------------------------------------------|-----------|
| <i>R. solani</i> |                                                                                       | <i>Thymus</i> sp. leaves and stems         | MIC $\geq$ 5000 $\mu\text{g}\cdot\text{mL}^{-1}$                | This work |
|                  | Water:methanol (1:1 v/v)                                                              | <i>H. stoechas</i> inflorescences          | MIC = 187.5 $\mu\text{g}\cdot\text{mL}^{-1}$                    |           |
|                  | Aqueous, lanolin or cocoa butter extracts                                             | <i>Larrea tridentata</i> leaves            | IC <sub>50</sub> = 185–5710 $\mu\text{g}\cdot\text{mL}^{-1}$    | [46]      |
|                  |                                                                                       | <i>F. cernua</i> leaves                    | IC <sub>50</sub> = 420–2120 $\mu\text{g}\cdot\text{mL}^{-1}$    |           |
|                  |                                                                                       | <i>Agave lechuguilla</i> leaves            | IC <sub>50</sub> = n.a.–17,000 $\mu\text{g}\cdot\text{mL}^{-1}$ |           |
|                  |                                                                                       | <i>Opuntia</i> sp. stalks                  | IC <sub>50</sub> = 3830–20,800 $\mu\text{g}\cdot\text{mL}^{-1}$ |           |
|                  |                                                                                       | <i>Yucca</i> sp. leaves                    | IC <sub>50</sub> = 8140–57,400 $\mu\text{g}\cdot\text{mL}^{-1}$ |           |
|                  | Ethanol/water extracts at 4%                                                          | <i>Cinnamomum verum</i>                    | IR = 95.8%                                                      | [47]      |
|                  |                                                                                       | <i>Pimpinella anisum</i>                   | IR = 90.8%                                                      |           |
|                  |                                                                                       | <i>Nigella sativa</i>                      | IR = 90.5%                                                      |           |
|                  |                                                                                       | <i>Syzygium aromaticum</i>                 | IR = 100%                                                       |           |
|                  | Aqueous extracts at 5, 10, and 20%                                                    | <i>P. hysterophorus</i> leaves and flowers | IR = 19.6–32.2%                                                 | [29]      |
|                  |                                                                                       | <i>M. charantia</i> leaves                 | IR = 37.7–61.1%                                                 |           |
|                  |                                                                                       | <i>A. sativum</i> cloves                   | IR = 62.2–63.3%                                                 |           |
|                  |                                                                                       | <i>E. globulus</i> leaves                  | IR = 59.6–70.7%                                                 |           |
|                  |                                                                                       | <i>C. procera</i> leaves                   | IR = 11.1%                                                      |           |
|                  |                                                                                       | <i>A. vera</i> leaves                      | IR = 33.3–38.8%                                                 |           |
|                  |                                                                                       | <i>B. vulgaris</i> root                    | IR = 36.3–40.3%                                                 |           |
|                  |                                                                                       | <i>D. stramonium</i> leaves                | IR = 55.5–72.2%                                                 |           |
|                  | Aqueous extracts at 100%                                                              | <i>Lawsonia inermis</i> leaves             | IR = 100%                                                       | [48]      |
|                  |                                                                                       | <i>Pelargonium graveolens</i> leaves       | IR = 22%                                                        |           |
|                  |                                                                                       | <i>P. longifolia</i> leaves                | IR = 26%                                                        |           |
|                  |                                                                                       | <i>Piper betel</i> leaves                  | IR = 100%                                                       |           |
|                  | Ethyl acetate, methanol or n-hexane extracts at 1000 $\mu\text{g}\cdot\text{mL}^{-1}$ | <i>L. inermis</i> leaves                   | IR = n.a.–100%                                                  | [49]*     |
|                  |                                                                                       | <i>P. graveolens</i> leaves                | IR = n.a.–100%                                                  |           |
|                  |                                                                                       | <i>P. longifolia</i> leaves                | IR = n.a.–100%                                                  |           |
|                  |                                                                                       | <i>P. betel</i> leaves                     | IR = n.a.–100%                                                  |           |
|                  | Aqueous extracts at 5%                                                                | <i>Capsicum frutescens</i> fruits          | IR = 71.1%                                                      | [49]*     |
|                  |                                                                                       | <i>E. globulus</i> leaves                  | IR = 37.8%                                                      |           |
|                  |                                                                                       | <i>Eruca sativa</i> seeds                  | IR = 34.4%                                                      |           |
|                  |                                                                                       | <i>A. sativum</i> bulbs                    | IR = 40%                                                        |           |
|                  |                                                                                       | <i>Trigonella foenum-graecum</i> seeds     | IR = 42.2%                                                      |           |
|                  |                                                                                       | <i>L. camara</i> flowers and leaves        | IR = 43.3%                                                      |           |
|                  |                                                                                       | <i>Cymbopogon citratus</i> leaves          | IR = 55.6%                                                      |           |
|                  |                                                                                       | <i>A. cepa</i> bulbs or seeds              | IR = 32.3–58.9%                                                 |           |

|                                                |                                      |                 |       |
|------------------------------------------------|--------------------------------------|-----------------|-------|
| Aqueous extracts at 20%                        | <i>S. officinalis</i> leaves         | IR = 33.3%      | [50]  |
|                                                | <i>Polystichum squarrosus</i> leaves | IR = 24.35%     |       |
|                                                | <i>Adiantum venustum</i> leaves      | IR = 10.57%     |       |
|                                                | <i>P. hystrophorus</i> leaves        | IR = 33.12%     |       |
|                                                | <i>Urtica dioica</i> leaves          | IR = 18.80%     |       |
|                                                | <i>Cannabis sativa</i> leaves        | IR = 47.59%     |       |
| Ethanol extracts at 10,000 µg·mL <sup>-1</sup> | <i>H. anthelmintica</i> fruits       | IR = 100%       | [25]  |
|                                                | <i>C. magna</i> fruits               | IR = 17.41%     |       |
|                                                | <i>C. sappan</i> barks               | n.a.            |       |
|                                                | <i>X. lanceatum</i> fruits           | IR = 57.41%     |       |
|                                                | <i>C. brachiata</i> barks            | IR = 4.81%      |       |
| Aqueous or ethanol extracts at 1:1 (w/v)       | <i>Eucalyptus</i>                    | IR = 32.9%      | [51]* |
|                                                | <i>Pelargonium cucullatum</i>        | IR = 48.1%      |       |
|                                                | <i>Mentha suaveolens</i>             | IR = 35%        |       |
|                                                | <i>Alpinia zerumbet</i>              | IR = 53.6%      |       |
|                                                | <i>Artemisia capillaris</i>          | IR = 63.7%      |       |
|                                                | <i>R. officinalis</i>                | IR = 67.7%      |       |
|                                                | <i>S. aromaticum</i>                 | IR = 100%       |       |
| Aqueous extracts at 15%                        | <i>A. indica</i>                     | IR = 38.1–87.5% | [52]  |
|                                                | <i>A. indica</i>                     | IR = 76.67%     |       |
|                                                | <i>Ocimum basilicum</i>              | IR = 61.11%     |       |
|                                                | <i>Cymbopogon flexuosus</i>          | IR = 94.44%     |       |
|                                                | <i>T. vulgaris</i>                   | IR = 94.44%     |       |
|                                                | <i>A. vera</i>                       | IR = 61.11%     |       |
|                                                | <i>Tagetes patula</i>                | IR = 92.59%     |       |
|                                                | <i>Cordia curassavica</i>            | IR = 85.18%     |       |
|                                                | <i>Aegle marmelos</i>                | IR = 64.82%     |       |
|                                                | <i>Allium fistulosum</i>             | n.a.            |       |
| Aqueous extracts at 10%                        | <i>S. aromaticum</i>                 | IR = 94.44%     | [53]  |
|                                                | <i>Calotropis gigantean</i>          | IR = 9.26%      |       |
|                                                | <i>A. sativum</i> cloves             | IR = 100%       |       |
|                                                | <i>Tagetes</i> spp. leaves           | IR = 76.30%     |       |
|                                                | <i>E. globulus</i> leaves            | IR = 75.56%     |       |
|                                                | <i>C. longa</i> rhizomes             | IR = 78.52%     |       |
|                                                | <i>Z. officinale</i> rhizomes        | IR = 80%        |       |

|                                                         |                                                                    |                                                  |                                |      |
|---------------------------------------------------------|--------------------------------------------------------------------|--------------------------------------------------|--------------------------------|------|
| Aqueous or ethanol extracts at 2500 µg·mL <sup>-1</sup> | <i>A. cepa</i> bulbs                                               | IR = 37.78%                                      | [54]                           |      |
|                                                         | <i>Ocimum</i> spp. leaves                                          | IR = 37.78%                                      |                                |      |
|                                                         | <i>Piper guinensis</i> leaves                                      | IR = 84.4–100%                                   |                                |      |
|                                                         | <i>O. sanctum</i> leaves                                           | IR = 53.8–67.1%                                  |                                |      |
|                                                         | <i>Ocimum gratissimum</i> leaves                                   | IR = 58.7–72.3%                                  |                                |      |
|                                                         | <i>Cymbopogon citratus</i> leaves                                  | IR = 72.5–86.8%                                  |                                |      |
|                                                         | <i>C. lemon</i> leaves                                             | IR = 9.5–20.8%                                   |                                |      |
|                                                         | Chloroform, hexane or methanol extracts at 400 µg·mL <sup>-1</sup> | <i>T. arjuna</i> leaves                          | IR = 19.81–54.07%              | [26] |
|                                                         |                                                                    | <i>C. infortunatum</i> leaves                    | IR = 24.07–100%                |      |
|                                                         |                                                                    | <i>A. graveolens</i> seeds                       | IR = 61.11–85.93%              |      |
|                                                         |                                                                    | <i>Z. officinale</i> rhizomes                    | IR = 20.37–100%                |      |
|                                                         |                                                                    | <i>A. sativum</i> bulbs                          | IR = 20.74–27.41%              |      |
|                                                         |                                                                    | <i>L. camara</i> leaves                          | IR = 15.19–24.44%              |      |
|                                                         |                                                                    | <i>N. tabacum</i> leaves                         | IR = 26.30–37.78%              |      |
|                                                         |                                                                    | <i>P. hydropiper</i> leaves                      | IR = 35.56–52.96%              |      |
|                                                         |                                                                    | <i>P. pinnata</i> seeds                          | IR = 17.41–22.96%              |      |
| <i>P. longifolia</i> leaves                             |                                                                    | IR = 16.85–100%                                  |                                |      |
| <i>T. grandis</i> leaves                                | IR = 20.74–34.81%                                                  |                                                  |                                |      |
| Ethanol extract                                         | <i>M. spicata</i> leaves and stems                                 | MIC = 5%                                         | [37]                           |      |
| Water:methanol (1:1 v/v)                                | <i>H. stoechas</i> inflorescences                                  | MIC = 187.5 µg·mL <sup>-1</sup>                  | This work                      |      |
| Methanol/water extract (1:1 v/v)                        | <i>A. maritima</i> flowers                                         | MIC = 375 µg·mL <sup>-1</sup>                    | [28]                           |      |
| Chloroform, ethyl acetate, methanol or hexane extracts  | <i>C. nocturnum</i> flowers                                        | MIC = 250–1000 µg·mL <sup>-1</sup>               | [31]                           |      |
| <i>S. sclerotiorum</i>                                  | Aqueous extracts                                                   | <i>Trachystemon orientalis</i> leaves or flowers | MIC = 1–7%                     | [55] |
|                                                         | Crude extracts                                                     | <i>R. officinalis</i> leaves                     | MIC = 10%                      | [56] |
|                                                         |                                                                    | <i>Salvia fruticosa</i> leaves                   | MIC = 20%                      |      |
|                                                         | Ethanol extract                                                    | <i>M. spicata</i> leaves and stems               | MIC = 5%                       | [37] |
|                                                         | Aqueous extract                                                    | <i>A. sativum</i> leaves                         | MIC = 5000 µg·mL <sup>-1</sup> | [38] |

\* In these studies, only the most active extracts have been included in the comparison table. IR: inhibition rate; MIC: minimum inhibitory concentration; IC<sub>50</sub>: half-maximal inhibitory concentration; n.a.: no activity at the highest concentration tested; n.s.: not specified.

## References (reference numbers do not match those that appear in the main document)

1. Kantwa, S.; Tatarwal, J.; Shekhawat, K. In vitro effect of fungicides and phyto-extracts against *Alternaria alternata* causing leaf blight of groundnut. *IOSR Journal of Agriculture and Veterinary Science* **2014**, *7*, 28-31.
2. Singh, P.; Srivastava, D. Biofungicidal or biocontrol activity of *Lantana camara* against phytopathogenic *Alternaria alternata*. *International Journal of Pharmaceutical Sciences and Research* **2012**, *3*, 4818-4821, doi:10.13040/IJPSR.0975-8232.3(12).4818-21.
3. Carvalho, D.D.C.; Alves, E.; Camargos, R.B.; Oliveira, D.F.; Scolforo, J.R.S.; de Carvalho, D.A.; Batista, T.R.S. Plant extracts to control *Alternaria alternata* in Murcott tangor fruits. *Revista Iberoamericana de Micología* **2011**, *28*, 173-178.
4. Nagaraju, K.; Mishra, J.P.; Prasad, R.; Sekhar, J.C.; Reddy, V.P.; Kumar, S. Isolation and in vitro evaluation of different botanicals on mycelia growth of *Alternaria alternata* (Fr.) Keissler causing leaf spot of brinjal. *J. Pharmacogn. Phytochem.* **2020**, *9*, 889-891.
5. Sharma, R.L.; Ahir, R.; Yadav, S.L.; Sharma, P.; Ghasolia, R. Effect of nutrients and plant extracts on *Alternaria* blight of tomato caused by *Alternaria Alternata*. *Journal of Plant Diseases and Protection* **2021**, *128*, 951-960.
6. Carmello, C.R.; Magri, M.M.R.; Cardoso, J.C. Cinnamon extract and sodium hypochlorite in the in vitro control of *Fusarium oxysporum* f. sp. *lycopersici* and *Alternaria alternata* from tomato. *Journal of Phytopathology* **2022**, *170*, 802-810.
7. Shingne, A.W.; Giri, G.; Bagade, A.R. In vitro evaluation of fungicides, botanicals and bio-agents against *Alternaria alternata* causing leaf spot disease of niger. *International Journal of Chemical Studies* **2020**, *8*, 3360-3364.
8. Rizwana, H.; Bokhari, N.A.; Alsahli, S.A.; Al Showiman, A.S.; Alzahrani, R.M.; Aldehaish, H.A. Postharvest disease management of *Alternaria* spots on tomato fruit by *Annona muricata* fruit extracts. *Saudi J. Biol. Sci.* **2021**, *28*, 2236-2244.
9. Bokhari, N.A.; Perveen, K. In vitro inhibition potential of *Phoenix dactylifera* L. extracts on the growth of pathogenic fungi. *Journal of Medicinal Plants Research* **2012**, *6*, 1083-1088.
10. Rodino, S.; Butu, M.; Petrache, P.; Butu, A.; Cornea, C.P. Antifungal activity of four plants against *Alternaria alternata*. *Scientific Bulletin. Series F. Biotechnologies* **2014**, *18*, 60-65.
11. Chaudhary, S.; Singh, H. In-vitro evaluation of different botanicals against *Alternaria alternata* causing *Alternaria* leaf spot of ber (*Zizyphus mauritiana* Lamk.). *International Journal of Economic Plants* **2021**, *8*, 40-44.
12. Kharbadkar, V.P.; Kadam, J.; Dalvi, N.; Phondekar, U.; Chaure, N.; Gaonkar, R.; Joshi, M. In vitro exploration of botanicals and fungicides against *Alternaria alternata* inciting leaf blight disease of chrysanthemum. *Pharma Innovation Journal* **2022**, *11*, 68-71.
13. Teixeira, A.; Sánchez-Hernández, E.; Noversa, J.; Cunha, A.; Cortez, I.; Marques, G.; Martín-Ramos, P.; Oliveira, R. Antifungal activity of plant waste extracts against phytopathogenic fungi: *Allium sativum* peels extract as a promising product targeting the fungal plasma membrane and cell wall. *Horticulturae* **2023**, *9*, 136, doi:10.3390/horticulturae9020136.
14. Ogbabor, N.; Adekunle, A.; Enobakhare, D. Inhibition of *Colletotrichum gloeosporioides* (Penz) Sac. causal organism of rubber (*Hevea brasiliensis* Muell. Arg.) leaf spot using plant extracts. *African Journal of Biotechnology* **2007**, *6*, 213-218.
15. Necha, L.L.B.; Luna, L.B.; Torres, K.B.; Baños, S.B. Antifungal activity of leaf and stem extracts from various plant species on the incidence of *Colletotrichum gloeosporioides* of papaya and mango fruit after storage. *Revista Mexicana de Fitopatología* **2002**, *20*, 8-12.
16. Gwa, V.; Nwankiti, A. Efficacy of some plant extracts in in vitro control of *Colletotrichum* species, causal agent of yam (*Dioscorea rotundata* Poir) tuber rot. *Asian Journal of Plant Science and Research* **2017**, *7*, 8-16.
17. Peraza-Sánchez, S.R.; Chan-Che, E.O.; Ruiz-Sánchez, E. Screening of Yucatecan plant extracts to control *Colletotrichum gloeosporioides* and isolation of a new pimarane from *Acacia pennatula*. *J. Agric. Food. Chem.* **2005**, *53*, 2429-2432.
18. Shovan, L.; Bhuiyan, M.; Begum, J.; Pervez, Z. In vitro control of *Colletotrichum dematium* causing anthracnose of soybean by fungicides, plant extracts and *Trichoderma harzianum*. *Int. J. Sustain. Crop Prod* **2008**, *3*, 10-17.
19. Deressa, T.; Lemessa, F.; Wakjira, M. Antifungal activity of some invasive alien plant leaf extracts against mango (*Mangifera indica*) anthracnose caused by *Colletotrichum gloeosporioides*. *International Journal of Pest Management* **2015**, *61*, 99-105.
20. López-Velázquez, J.G.; Delgado-Vargas, F.; Ayón-Reyna, L.E.; López-Angulo, G.; Bautista-Baños, S.; Uriarte-Gastelum, Y.G.; López-López, M.E.; Vega-García, M.O. Postharvest application of

- partitioned plant extracts from Sinaloa, Mexico for controlling papaya pathogenic fungus *Colletotrichum gloeosporioides*. *Journal of Plant Pathology* **2021**, *103*, 831-842.
21. Masangwa, J.; Aveling, T.; Kritzing, Q. Screening of plant extracts for antifungal activities against *Colletotrichum* species of common bean (*Phaseolus vulgaris* L.) and cowpea (*Vigna unguiculata* (L.) Walp). *The Journal of Agricultural Science* **2013**, *151*, 482-491.
  22. Hernández-Ceja, A.; Loeza-Lara, P.; Espinosa-García, F.; García-Rodríguez, Y.; Medina-Medrano, J.; Gutiérrez-Hernández, G.; Ceja-Torres, L. In vitro antifungal activity of plant extracts on pathogenic fungi of blueberry. *Plants* **2021**, *10*, 852, doi:10.3390/plants10050852.
  23. Mukherjee, A.; Khandker, S.; Islam, M.; Shahid, S.B. Efficacy of some plant extracts on the mycelial growth of *Colletotrichum gloeosporioides*. *Journal of the Bangladesh Agricultural University* **2011**, *9*, 43-47, doi:10.3329/jbau.v9i1.8742.
  24. Silva, A.V.; Yereña, L.R.; Necha, L.L.B. Chemical profile and antifungal activity of plant extracts on *Colletotrichum* spp. isolated from fruits of *Pimenta dioica* (L.) Merr. *Pestic. Biochem. Physiol.* **2021**, *179*, 104949.
  25. Jantasorn, A.; Moungsrimuangdee, B.; Dethoup, T. In vitro antifungal activity evaluation of five plant extracts against five plant pathogenic fungi causing rice and economic crop diseases. *Journal of Biopesticides* **2016**, *9*, 1.
  26. Choudhury, D.; Anand, Y.R.; Kundu, S.; Nath, R.; Kole, R.K.; Saha, J. Effect of plant extracts against sheath blight of rice caused by *Rhizoctonia solani*. *J. Pharmacogn. Phytochem.* **2017**, *6*, 399-404.
  27. Rashid, T.S.; Awla, H.K.; Sijam, K. Antifungal effects of *Rhus coriaria* L. fruit extracts against tomato anthracnose caused by *Colletotrichum acutatum*. *Ind Crops Prod* **2018**, *113*, 391-397, doi:10.1016/j.indcrop.2018.01.066.
  28. Sánchez-Hernández, E.; Martín-Ramos, P.; Navas Gracia, L.M.; Martín-Gil, J.; Garcés-Claver, A.; Flores-León, A.; González-García, V. *Armeria maritima* (Mill.) Willd. flower hydromethanolic extract for cucurbitaceae fungal diseases control. *Molecules* **2023**, *28*, 3730, doi:10.3390/molecules28093730.
  29. Cherkupally, R.; Kota, S.R.; Amballa, H.; Reddy, B.N. In vitro antifungal potential of plant extracts against *Fusarium oxysporum*, *Rhizoctonia solani* and *Macrophomina phaseolina*. *Annals of Plant Sciences* **2017**, *6*, 1676, doi:10.21746/aps.2017.9.2.
  30. Rongai, D.; Pulcini, P.; Pesce, B.; Milano, F. Antifungal activity of pomegranate peel extract against fusarium wilt of tomato. *European Journal of Plant Pathology* **2017**, *147*, 229-238.
  31. Al-Reza, S.M.; Rahman, A.; Ahmed, Y.; Kang, S.C. Inhibition of plant pathogens in vitro and in vivo with essential oil and organic extracts of *Cestrum nocturnum* L. *Pestic. Biochem. Physiol.* **2010**, *96*, 86-92, doi:10.1016/j.pestbp.2009.09.005.
  32. Bashir, M.; Chakma, M. In vitro control of *Fusarium solani* and *F. oxysporum* the causative agent of brinjal wilt. *Dhaka University Journal of Biological Sciences* **2014**, *23*, 53-60.
  33. De Rodriguez, D.J.; Hernández-Castillo, D.; Angulo-Sánchez, J.; Rodríguez-García, R.; Quintanilla, J.V.; Lira-Saldivar, R. Antifungal activity in vitro of *Flourensia* spp. extracts on *Alternaria* sp., *Rhizoctonia solani*, and *Fusarium oxysporum*. *Ind Crops Prod* **2007**, *25*, 111-116.
  34. El-Mohamedy, R.S.; Abdalla, A.M. Evaluation of antifungal activity of *Moringa oleifera* extracts as natural fungicide against some plant pathogenic fungi in vitro. *Journal of Agricultural Technology* **2014**, *10*, 963-982.
  35. Satish, S.; Raghavendra, M.; Raveesha, K. Antifungal potentiality of some plant extracts against *Fusarium* sp. *Archives of Phytopathology and Plant Protection* **2009**, *42*, 618-625.
  36. Nelson, D.; Beattie, K.; McCollum, G.; Martin, T.; Sharma, S.; Rao, J.R. Performance of natural antagonists and commercial microbiocides towards in vitro suppression of flower bed soil-borne *Fusarium oxysporum*. *Advances in Microbiology* **2014**, *4*, 151-159, doi:10.4236/aim.2014.43020.
  37. Naji, E.T. Study of alkaloids, phenols and terpenes of *Mentha spicata* as a fungicide against *Rhizoctonia solani*, *Sclerotinia sclerotiorum* and *Fusarium oxysporum*. *International Journal of Advanced Biological Research* **2017**, *7*, 345-354.
  38. Singh, U.; Pathak, K.; Khare, M.; Singh, R. Effect of leaf extract of garlic on *Fusarium oxysporum* f. sp. *ciceri*, *Sclerotinia sclerotiorum* and on gram seeds. *Mycologia* **1979**, *71*, 556-564.
  39. Sánchez-Hernández, E.; Balduque-Gil, J.; González-García, V.; Barriuso-Vargas, J.J.; Casanova-Gascón, J.; Martín-Gil, J.; Martín-Ramos, P. Phytochemical profiling of *Sambucus nigra* L. flower and leaf extracts and their antimicrobial potential against almond tree pathogens. *Int. J. Mol. Sci.* **2023**, *24*, 1154, doi:10.3390/ijms24021154.
  40. Sánchez-Hernández, E.; Martín-Ramos, P.; Martín-Gil, J.; Santiago-Aliste, A.; Hernández-Navarro, S.; Oliveira, R.; González-García, V. Bark extract of *Uncaria tomentosa* L. for the control of strawberry phytopathogens. *Horticulturae* **2022**, *8*, doi:10.3390/horticulturae8080672.

41. Salamone, A.; Zizzo, G.; Scarito, G. The antimicrobial activity of water extracts from Labiatae. *Acta Hort* **2006**, 723, 465-470, doi:10.17660/ActaHortic.2006.723.67.
42. Erdoğan, O.; Celik, A.; Zeybek, A. In vitro antifungal activity of mint, thyme, lavender extracts and essential oils on *Verticillium dahliae* Kleb. *Fresenius Environmental Bulletin* **2016**, 25, 4856-4862.
43. Wang, Y.; Li, J.; Chen, Q.; Zhou, J.; Xu, J.; Zhao, T.; Huang, B.; Miao, Y.; Liu, D. The role of antifungal activity of ethyl acetate extract from *Artemisia argyi* on *Verticillium dahliae*. *Journal of Applied Microbiology* **2022**, 132, 1343-1356.
44. Abdelgaleil, S.; Saad, M.; Ariefta, N.; Shiono, Y. Antimicrobial and phytotoxic activities of secondary metabolites from *Haplophyllum tuberculatum* and *Chrysanthemum coronarium*. *S. Afr. J. Bot.* **2020**, 128, 35-41.
45. Varo, A.; Mulero-Aparicio, A.; Adem, M.; Roca, L.; Raya-Ortega, M.; López-Escudero, F.; Trapero, A. Screening water extracts and essential oils from Mediterranean plants against *Verticillium dahliae* in olive. *Crop Protection* **2017**, 92, 168-175.
46. Castillo, F.; Hernández, D.; Gallegos, G.; Mendez, M.; Rodríguez, R.; Reyes, A.; Aguilar, C.N. In vitro antifungal activity of plant extracts obtained with alternative organic solvents against *Rhizoctonia solani* Kühn. *Ind Crops Prod* **2010**, 32, 324-328, doi:10.1016/j.indcrop.2010.05.013.
47. Al-Askar, A.A.; Rashad, Y.M. Efficacy of some plant extracts against *Rhizoctonia solani* on pea. *Journal of Plant Protection Research* **2010**, 50, 239-243, doi:10.2478/v10045-010-0042-0.
48. Seema, M.; Sreenivas, S.; Rekha, N.; Devaki, N. In vitro studies of some plant extracts against *Rhizoctonia solani* Kuhn infecting FCV tobacco in Karnataka Light Soil, Karnataka, India. *Journal of Agricultural technology* **2011**, 7, 1321-1329.
49. Abd-El-Khair, H.; El-Gamal Nadia, G. Effects of aqueous extracts of some plant species against *Fusarium solani* and *Rhizoctonia solani* in *Phaseolus vulgaris* plants. *Archives of Phytopathology and Plant Protection* **2011**, 44, 1-16.
50. Tapwal, A.; Garg, S.; Gautam, N.; Kumar, R. In vitro antifungal potency of plant extracts against five phytopathogens. *Brazilian Archives of Biology and Technology* **2011**, 54, 1093-1098.
51. San Aye, S.; Matsumoto, M. Effect of some plant extracts on *Rhizoctonia* spp. and *Sclerotium hydropphilum*. *J. Med. Plants Res* **2011**, 5, 3751-3757.
52. Persaud, R.; Khan, A.; Isaac, W.-A.; Ganpat, W.; Saravanakumar, D. Plant extracts, bioagents and new generation fungicides in the control of rice sheath blight in Guyana. *Crop Protection* **2019**, 119, 30-37, doi:10.1016/j.cropro.2019.01.008.
53. Chakrapani, K.; Sinha, B.; Chanu, W.T.; Chakma, T.; Siram, T. Assessing in vitro antifungal activity of plant extracts against *Rhizoctonia solani* causing sheath blight of rice (*Oryza sativa* L.). *J. Pharmacogn. Phytochem.* **2020**, 9, 1497-1501.
54. Amadioha, A. Fungicidal activity of some plant extracts against *Rhizoctonia*. *Archives of Phytopathology & Plant Protection* **2001**, 33, 509-517.
55. Onaran, A.; Yılar, M. Antifungal and herbicidal activity of *Trachystemon orientalis* (L.) G. Don against some plant pathogenic fungi and *Cuscuta campestris* Yunck. *Iğdır Univ. J. Inst. Sci. & Tech.* **2018**, 8, 37-43.
56. Goussous, S.; Mas' ad, I.; Abu El-Samen, F.; Tahhan, R. In vitro inhibitory effects of rosemary and sage extracts on mycelial growth and sclerotial formation and germination of *Sclerotinia sclerotiorum*. *Archives of Phytopathology and Plant Protection* **2013**, 46, 890-902.
